# Supplementary material for: Effects of Dietary Fiber Sources during Gestation on Stress Status, Abnormal Behaviors and Reproductive Performance of Sows
Source: MDPI journal article supplement (doi:10.3390/ani10010141), 2020-01-15
Supplement: s1 [file s1]

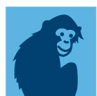

# Effects of Dietary Fiber Sources during Gestation on Stress Status, Abnormal Behaviors and Reproductive Performance of Sows

Shuangbo Huang <sup>1</sup>, Jianfu Wei <sup>2</sup>, Haoyuan Yu <sup>1</sup>, Xiangyu Hao <sup>1</sup>, Jianjun Zuo <sup>1</sup>, Chengquan Tan <sup>1,3,\*</sup> and Jinping Deng <sup>1,\*</sup>

Table S1. Behavior and definition.

| Behavior          | Definition                                                                          |
|-------------------|-------------------------------------------------------------------------------------|
| Drinking          | Manipulating the nipple drinker                                                     |
| Sham-chewing      | The behavior of the sow's mouth in the absence of food                              |
| Sniffing, licking | Nasal stabilization or tongue contact with the ground, railings, or no water trough |
| Standing          | Body supported by four legs, with or without stamping                               |
| Sitting           | Body supported by the front legs, with hind legs and bottom flat on the ground      |
| Lying             | Body supported by less than three legs                                              |
| Position change   | Any motion involved in the transition of postures                                   |

**Table S2:** The number of sows during the experimental period

| Item                                 | Diet             |                 |                  |
|--------------------------------------|------------------|-----------------|------------------|
|                                      | CON <sup>1</sup> | RS <sup>1</sup> | FSF <sup>1</sup> |
| Mating                               | 26               | 26              | 26               |
| At day 109 of gestation <sup>2</sup> | 22               | 21              | 24               |
| Farrowing                            | 22               | 21              | 24               |
| Culled during lactation <sup>3</sup> | 3                | 0               | 2                |
| Weaning                              | 19               | 21              | 22               |

<sup>1</sup> CON—control diet group; RS—5% resistant starch diet group; FSF—5% fermented soybean fiber diet group; <sup>2</sup> Sows were culled because of foot pain, abortion, or non-pregnant after breeding, etc.; <sup>3</sup> Sows were culled because of poor milk.
